1 **17-(Allylamino)-17demethoxygeldanamycin reduces**  
2 **Endoplasmic Reticulum (ER) stress-induced**  
3 **mitochondrial dysfunction in C2C12 myotubes**

4

5 Adam P. Lightfoot<sup>1,2</sup>, Rhiannon S. Morgan<sup>1</sup>, Joanna E. Parkes<sup>3</sup>, Anastasia Thoma<sup>2</sup>, Lesley A.  
6 Iwanejko<sup>1</sup>, Robert G. Cooper<sup>1</sup>.

7 <sup>1</sup>MRC/Arthritis Research UK Centre for Integrated Research into Musculoskeletal Ageing, University  
8 of Liverpool, UK; <sup>2</sup>School of Healthcare Science, Faculty of Science & Engineering, Manchester  
9 Metropolitan University, UK; <sup>3</sup>Division of Population Health, Health Services Research and Primary  
10 Care, University of Manchester, UK

11

12

13

14 **Corresponding Author:** Prof Robert G. Cooper MD FRCP, Department of Musculoskeletal Biology  
15 II, Institute of Ageing and Chronic Disease, Faculty of Health & Life Sciences, University of  
16 Liverpool, William Henry Duncan Building, West Derby Street, Liverpool, L7 8TX. Email:  
17 [robert.cooper@liverpool.ac.uk](mailto:robert.cooper@liverpool.ac.uk)

18 **Key words:** myositis, ER stress, 17AAG, mitochondria, skeletal muscle

19 **Short title:** ER stress and mitochondrial dysfunction in muscle

20

21

22

23

24

25

## 26 **Abstract**

27 In patients with myositis, persistent skeletal muscle weakness in the absence of significant  
28 inflammatory cell infiltrates is a well-recognised, but poorly understood, cause of morbidity. This has  
29 led researchers to investigate cellular mechanisms independent of immune cells, which may  
30 contribute to this underlying muscle weakness. Chronic ER stress pathway activation is evident in the  
31 muscle of myositis patients, and is now a potential mediator of muscle weakness in the absence of  
32 inflammation. Abnormal ER stress pathway activation is associated with mitochondrial dysfunction,  
33 resulting in bioenergetic deficits and reactive oxygen species (ROS) generation, which in this context  
34 may potentially damage muscle proteins and thus impair contractile performance. This study  
35 examined whether treatment with the HSP90 inhibitor 17-*N*-allylamino-17-demethoxygeldanamycin  
36 (17AAG) could mitigate these ER stress-induced changes. C2C12 myotubes were treated with the ER  
37 stress-inducing compound Tunicamycin, in the presence or absence of 17AAG. Myotubes were  
38 examined for changes relating to ER stress pathway activation, mitochondrial function, markers of  
39 oxidative damage and in myotubular dimensions. ER stress pathway activation caused mitochondrial  
40 dysfunction, as evidenced by reduced oxygen consumption and ATP generation and by increased  
41 gene expression levels of the bio-energetic regulator, uncoupling protein 3 (*UCP-3*), the latter  
42 indicative of electron transport chain uncoupling. ER stress pathway activation also caused increased  
43 gene expression of superoxide dismutase (*SOD*) 2 and peroxiredoxin (*PRDX*) 3, elevated H<sub>2</sub>O<sub>2</sub> levels,  
44 and reduced total thiol pool levels and a significant diminution of myotubular dimensions. Exposure  
45 to 17AAG ameliorated these ER stress-induced changes. These findings, which suggest that 17AAG  
46 can reduce ER stress-induced mitochondrial dysfunction, oxidative damage and myotubular atrophy,  
47 have potential implications in the context of human myositis.

48

49

50

51

## 52 **Background**

53 The idiopathic inflammatory myopathies, collectively termed myositis are characterised by  
54 infiltrations of T and B cells preferentially into the proximal muscles, to cause myofibre damage and  
55 debilitating proximal muscle weakness. A histological hallmark of myositis is the detection of up-  
56 regulated human leukocyte antigen (HLA) I, both within and on the cell surface of muscle fibres seen  
57 in diagnostic muscle biopsies, [1]. Traditionally it has been assumed that infiltration of inflammatory  
58 T and B cells in myositis represents the key pathological mechanism responsible for damaging  
59 myofibres, and infiltrating inflammatory cells clearly do have this potential, [2]. However, that  
60 inflammatory cells are the sole pathogenic effector causing myofibre damage is being challenged by  
61 accumulating evidence that non-immune cell-mediated factors are also implicated, [3].

62 The inflammatory cell loads detected in diagnostic muscle biopsies often correlate only poorly with  
63 the severity of myositis patients' demonstrable weakness, while weakness frequently persists in  
64 patients with apparently well suppressed muscle inflammation, [4] [5]. Furthermore, in immune-  
65 mediated necrotising myopathy, a myositis subtype so called because it associates strongly with the  
66 presence of anti-SRP or anti-HMGCoA reductase autoantibodies and marked creatine kinase  
67 elevations, severe myonecrosis occurs in the absence or marked paucity of infiltrating B and T cells,  
68 [6]. Lastly, in a murine model of inflammatory myositis specifically induced by transgenic up-  
69 regulation of HLA I, weakness may actually precede inflammatory cell infiltrations, [4]. These  
70 findings clearly suggest that myotoxic factors other than immune cell infiltrates are also  
71 pathologically involved. Recent reviews have thus suggested that non-immune cell-mediated  
72 mechanisms must also play a significant cytotoxic role, over and above that expected from infiltrating  
73 inflammatory cells, [7, 8]. Research in human and murine myositis models suggests that chronic over-  
74 activation of the ER stress pathway also contributes to weakness induction, [9]. However, the precise  
75 mechanisms which mediate weakness induction downstream of ER stress pathway activation remain  
76 poorly understood, [7].

77 Studies in muscle and non-muscle cells demonstrate that ER stress pathway activation directly  
78 influences mitochondrial function, [10]. Pathway activation physiologically causes calcium ion  
79 release, which, when taken up by adjacent mitochondria, causes bioenergetic changes, including  
80 changes in ROS generation and ATP synthesis rates, [10-12]. These are normal functions, but when  
81 ER pathway activation is abnormal and/or prolonged, as occurs in myositis, growing evidence  
82 suggests that this may adversely affect mitochondrial function, [13, 14]. Research from this and other  
83 laboratories has demonstrated that targeted up-regulation of cytoprotective chaperones, i.e. heat shock  
84 proteins (HSPs), can potentially alleviate oxidative damage to skeletal muscle fibres from otherwise  
85 unchecked ROS generation, [15, 16]. Moreover, pharmacological up-regulation of molecular  
86 chaperones by use of 17AAG prevents contraction-induced muscle fibre damage in older mice, [17].

87 Given the mutual proximity of the ER and mitochondria within skeletal muscle cells, and the chronic  
88 nature of ER stress pathway activation in human myositis, we have in this study used an *in vitro*  
89 murine muscle cell model to mimic the ER stress component probably present in human myositis. The  
90 overall aim of the study was to test whether 17AAG could prevent or reduce ER stress-related  
91 mitochondrial dysfunction.

92

## 93 **Methods**

### 94 **Chemicals and reagents**

95 All chemicals and reagents were supplied by Sigma Aldrich, UK, unless stated otherwise.

### 96 **Cell culture, treatments, and preparation**

97 Murine C2C12 myotubes were cultured in standard conditions (5% CO<sub>2</sub>, 37°C) in Dulbecco's  
98 modified eagles medium (DMEM) supplemented with 10% foetal bovine serum (FBS) (v/v), 2mM L-  
99 glutamine and 50-i.u. penicillin. Cells were cultured to ~ 60-70% confluence, when the growth media

100 were replaced by differentiating media, containing 2% horse serum (HS). Cells were set to  
101 differentiate into myotubes over a seven-day period, all “treatments” being deployed on day seven. At  
102 this point, myotubes were treated with Tunicamycin (0.1µg/ml) in the absence or presence of 17AAG  
103 (0.1µg/ml) for a period of 24 hours. Tunicamycin induces ER stress, by inhibiting the *n*-glycosylation  
104 step of protein folding, and resulting in misfolded protein accumulations within the ER lumen. After  
105 24 hours of these treatments, or without either in the case of control cells, the muscle cells were  
106 harvested, using ice-cold phosphate buffered saline (PBS), and stored at -80°C until further analysis.

## 107 **Microscopy**

108 Without and following Tunicamycin, myotubes were imaged using confocal microscopy (x10  
109 magnification, Nikon instruments). Images were randomised and assigned to a blinded researcher for  
110 dimensional analysis. Myotubular diameters were determined using ImageJ software, measuring ten  
111 myotubes per dish. Dimensional data of treated cells were expressed as a percentage of those of the  
112 control cells, i.e. those receiving no Tunicamycin or 17AAG treatment.

## 113 **SDS-PAGE and western blotting**

114 Proteins were extracted from myotube lysates by brief sonication in RadioImmunoPrecipitation assay  
115 (RIPA) buffer, comprising: 150mM NaCl, 0.1% Triton X-100, 0.5% deoxycholic acid, 0.1% SDS,  
116 50mM Tris-HCl pH 8.0, supplemented with EDTA-free protease inhibitor cocktail and PhosSTOP  
117 phosphatase inhibitor cocktail, as per the manufacturer’s guidelines (Roche Pharmaceuticals).  
118 Quantification of total cellular protein was determined using the Bradford Assay, [18]. Fifty  
119 micrograms of sample was separated on 4%/12% acrylamide gels (National Diagnostics) and proteins  
120 transferred to a Polyvinylidene fluoride (PVDF) membrane by western blotting, using semi-dry  
121 transfer (Geneflow, UK). PVDF membranes were analysed using primary antibodies specific to  
122 Grp94 (1:2000), Grp78 (1:1000), IκBα (1:1000), Total OXPHOS antibody cocktail (1:1000), Caspase-  
123 12 (1:1000), Vinculin (1:5000), beta actin (1:5000), and phosphorylated JNK (1:500), with species-  
124 specific HRP-conjugate secondary antibodies (1:5000). Enhanced chemiluminescence (ECL)

125 (Amersham, Cardiff, UK) was used to detect bands using a Bio-Rad Chemi-doc XRS system with  
126 Imagelab software (Bio-Rad, Hercules, USA).

## 127 **qPCR**

128 The TRIzol phenol/chloroform method was used for RNA extraction, with purification by GeneJet  
129 clean-up kit (Thermo Fisher Scientific). Complimentary DNA was synthesised using Bio-Rad iScript  
130 first strand kit, according to the manufacturer's protocol (Bio-Rad, Hercules). Quantitative  
131 polymerase chain reaction (qPCR) was carried out using Sybr green master mix (Roche Diagnostics),  
132 in accordance with the manufacturer's protocol; and analysis undertaken using the  $2^{-\Delta\Delta ct}$  method, [19].  
133 The primers used are listed in **Supplementary Table 1**, the choice of housekeeping genes (s29,  
134 RPL7, RPL32) was determined based on stability of expression in C2C12 cells spanning treatment  
135 groups.

## 136 **Mitochondrial function assays**

137 Oxygen consumption was assessed using an Oxytherm clark electrode (Hansatech Instruments).  
138 Myotubes were harvested and suspended within the electrode chamber in *buffer z* comprising (in  
139 mM): 110 K-MES, 35 KCl, 1 EGTA, 5 K<sub>2</sub>HPO<sub>4</sub>, and 3 MgCl<sub>2</sub>.6 H<sub>2</sub>O, 0.03% fatty acid free bovine  
140 serum albumin (BSA), and 0.5µg/ml saponin, pH 7.1 at 37°C, [20]. Maximal respiration was induced  
141 by introducing 15mM of ADP, representing state 3 respiration; following depletion of ADP, cells  
142 revert to state 4 respiration, [21]. The respiratory control ratio (RCR) was determined by dividing the  
143 active respiration rate (state III) by the rate following ADP depletion (state IV). Note state IV  
144 respiration is not equivalent to basal respiration, typically occurring at a faster rate due to endogenous  
145 ATPase activity in cells, breaking down ATP generated to ADP (**Figure 1**). The phosphate:oxygen  
146 (P:O) ratio is the relationship between oxygen consumption and ATP synthesis, and was calculated by  
147 determining the volume of oxygen consumed during maximal respiration, [21]. Respirometry data  
148 were normalised to total cellular protein levels, the latter as determined by the Bradford Assay. Total  
149 myotubular ATP levels were determined using an ATP Bioluminescence assay kit HS II (Roche

150 Pharmaceuticals), in accordance with the manufacturer's protocol. Total ATP concentrations were  
151 normalised to total cellular protein levels, as per the Bradford assay. Total protein thiols (sulphdryl)  
152 were quantified in the myotube harvests in 1% 5-sulfosalicylic acid (SSA) solution, and re-suspended  
153 in Tris/HCl buffer, as described by Di Monte et al, [22]. Total thiol levels were normalised to total  
154 cellular protein levels, as per the Bradford assay.

## 155 **Amplex Red assay**

156 Hydrogen peroxide levels in C2C12 myotubes treated with Tunicamycin, with or without 17AAG  
157 were quantified by the Amplex Red assay (Thermo Fisher Scientific), in accordance with the  
158 manufacturer's protocol, [23].

## 159 **Phosphorylated JNK ELISA**

160 Following Tunicamycin treatment, without or with 17AAG, whole cell lysates were isolated from the  
161 myotubes, and ELISA (eBioscience) used to detect phosphorylated levels of Jun N-terminal kinase  
162 (JNK), in accordance with the manufacturer's protocol. Data were normalised to total cellular protein  
163 levels, as per the Bradford assay.

## 164 **Statistical Analysis**

165 Data are presented as mean  $\pm$  SEM; statistical analyses made using analysis of variance (ANOVA),  
166 followed by *post hoc* least significant difference testing or Kruskal-Wallis test where appropriate.  
167 Data were analysed using SPSS software, and p values  $\leq$  0.05 considered as statistically significant.

168

169

170

171

172

## 173 **Results**

### 174 **17AAG protects against ER stress-induced myotubular atrophy,** 175 **but does not alter Tunicamycin-induced ER stress pathway** 176 **activation**

177 Doses of 1.0 and 10  $\mu\text{g/ml}$  of Tunicamycin induced significant myotubular caspase-12 cleavage  
178 (**Figure 2A**); indicating that apoptosis had been induced at these dosages. A Tunicamycin dose of  
179 0.1 $\mu\text{g/ml}$  did not induce significant caspase-12 cleavage, confirming that apoptosis had not occurred.  
180 Thus, the term Tunicamycin hereafter always refers to this non-apoptotic dose (0.1 $\mu\text{g/ml}$ ). Treatment  
181 of myotubes with this Tunicamycin dose induced significant increases in protein levels of Grp78 and  
182 Grp94 (**Figure 2B-C**), and up-regulation of gene levels of spliced *XBP-1* (**Figure 2C**), results clearly  
183 confirming that ER stress had been induced, [24]. Grp94 protein content was significantly reduced  
184 when tunicamycin was incubated in the presence of 17AAG (**Figures 2B**).

185 Treatment with non-apoptotic Tunicamycin doses also induced significant reductions in myotubular  
186 diameters (**Figures 3A-B**). Given these dimensional reductions, we interrogated for the mechanisms  
187 responsible. Surprisingly, no changes were detected in the gene expression levels of the ubiquitin  
188 ligases *Atrogin-1* and *MuRF-1*, both of which are known to mediate muscle fibre atrophy, [25]  
189 (**Figure 3C**). In contrast, Tunicamycin induced a significant reduction in I $\kappa$ B $\alpha$  levels (see later), an  
190 effect reduced when Tunicamycin was given with 17AAG (**Figures 3D-E**).

191



192

193 **17AAG protects against ER stress-induced mitochondrial**  
194 **dysfunction, and is associated with JNK phosphorylation**

195 Based on the knowledge that ER stress-induced mitochondrial dysfunction is associated with JNK  
196 phosphorylation, we investigated whether HSP70 up-regulation could modify this interaction, [12].  
197 Tunicamycin treatment significantly impaired mitochondrial function, as evidenced by reductions in  
198 the RCR and P:O ratios, and in total ATP levels, effects all ameliorated by 17AAG (**Figures 4A-C**).  
199 However, and perhaps surprisingly, we observed no changes in mitochondrial electron transport chain  
200 (ETC) complex density (**Figure 4D**), nor in any of the genes associated with mitochondrial  
201 biogenesis, fusion or fission (**Figures 4E**). At the same time, phosphorylated levels of JNK were  
202 increased with Tunicamycin treatment, an effect lessened by 17AAG (**Figure 4F-G**).

203

204 **ER stress-induced mitochondrial dysfunction is associated with**  
205 **increased markers of oxidative stress and ETC uncoupling**

206 Gene expression levels of *UCP-3* were elevated following Tunicamycin treatment, suggesting that the  
207 ETC had become uncoupled in response to ER stress. This effect was attenuated by 17AAG (**Figure**  
208 **5A**). Total thiol levels were reduced by Tunicamycin treatment, clearly suggesting that increased ROS  
209 generation had occurred in response to ER stress, an effect significantly reduced by 17AAG (**Figure**  
210 **5B**). Similarly,  $H_2O_2$  levels were elevated in response to ER stress and attenuated in the presence of  
211 17AAG (**Figure 5C**). Gene expression levels of the antioxidant enzymes *SOD2* and *PDRX3* were  
212 significantly increased by Tunicamycin treatment, again suggesting an elevated generation of ROS in  
213 response to ER stress, with a significant decline in *PDRX3* but not *SOD2* gene expression in the  
214 presence of 17AAG (**Figures 5C-D**).

215

## 216 **Discussion**

217 The ER stress pathway is an important component of the normal cellular protein folding machinery,  
218 permitting cells to manage perturbations in protein homeostasis. However, when chronically over-  
219 activated, the ER stress pathway also plays an important role in mediating various pathologies, [24].  
220 Patients with myositis exhibit chronic muscle ER stress pathway over-activation and this appears  
221 likely to play a pathogenic role, although the precise mechanisms remain to be elucidated. Given the  
222 mutual proximity of the ER and mitochondria in muscle cells, and the capability of the ER stress  
223 pathway to modify mitochondrial bioenergetics and induce ROS generation, others and we have  
224 suggested that these factors are a feasible cause of non-immune cell-mediated weakness induction in  
225 myositis, [3, 8]. Based on the cytoprotective properties of 17AAG in a range of myopathologies other  
226 than myositis, we speculated that this agent might reduce ER stress-induced mitochondrial  
227 dysfunction and limit potentially harmful ROS generation in skeletal muscle cells.

228 The *in vitro* model used here appears to mimic components of ER stress pathway activation in  
229 myositic muscle, illustrated by observations of elevated protein levels of Grp78 and Grp94 in both *in*  
230 *vivo* human and murine myositis [9], and as illustrated by the increased *XBP-1* gene splicing,  
231 following Tunicamycin treatment of murine myotubes, [9, 26]. In the absence of ER stress-induced  
232 apoptosis, the latter confirmed by the absence of caspase-12 cleavage, these current results suggest  
233 that any bioenergetic changes induced in the presented murine model were not associated with muscle  
234 cell death.

235 Myofibre atrophy is a key pathological feature of myositis. In the model being presented here, ER  
236 stress induced significant myotubular atrophy; but this was preventable by the pharmacological  
237 deployment of 17AAG. In view of the observation of induced myotubular atrophy, we investigated  
238 key players thought likely to be involved in atrophy induction, i.e. the atrogenes *Atrogin-1* and *MuRF-*  
239 *1*, and NF- $\kappa$ B activation. We have previously demonstrated the use of IkappaBalpha ( $\text{I}\kappa\text{B}\alpha$ )

240 degradation as a sensitive way of indirectly assessing nuclear factor kappa B (NF- $\kappa$ B) activity in  
241 C2C12 myotubes, [27]. Surprisingly, in the current experiments, we observed no Tunicamycin-  
242 induced changes in *Atrogin-1* or *MuRF-1* gene expression levels. However, Tunicamycin-induced ER  
243 stress did cause significant I $\kappa$ B $\alpha$  degradation, thus confirming that NF- $\kappa$ B activation had occurred, an  
244 effect significantly reduced by 17AAG. A role for NF- $\kappa$ B activation in inducing myotubular atrophy  
245 is well established in a rodent model of muscle wasting, [28]. Based on these observations we propose  
246 that the *in vitro* murine model presented here mimics at least some features exhibited by muscle cells  
247 from human myositis patients.

248 The current results confirm that ER stress pathway activation modifies myotubular oxygen utilisation,  
249 as evidenced by declines in the RCR and P:O ratios and falls in total cellular ATP levels. 17AAG  
250 prevented or ameliorated these induced bioenergetic deficits. Mechanistically these alterations in  
251 mitochondrial function have previously been attributed to phosphorylation of JNK by the ER stress  
252 receptor, inositol-requiring enzyme 1 (IRE1)  $\alpha$ , with subsequent migration of the P-JNK complex to  
253 the mitochondrial membrane, thus causing a depression of the ETC, [12, 29]. ER stress induced ETC  
254 depression has also been associated with elevated mitochondrial ROS generation, with its potential to  
255 cause oxidative damage to contractile proteins, [10]. In our *in vitro* model Tunicamycin-induced ER  
256 stress pathway activation was associated with increased phosphorylation of JNK, an effect clearly  
257 reduced by 17AAG. These findings support previous work linking ER stress activation to  
258 mitochondrial dysfunction via JNK phosphorylation, [12]. The precise mechanism for the  
259 downregulation of JNK phosphorylation is unclear. The activity of 17AAG orchestrated through its  
260 inhibition of HSP90 suggests a wealth of client proteins which could mediate these changes [30].  
261 Some evidence has shown that heat shock protein 70 (a HSP90 client protein) can regulate JNK  
262 phosphorylation, and this may be a mediator in our model – however, further investigation is needed  
263 in this context [31, 32].

264 Tunicamycin-induced ER stress pathway activation induced no changes in mitochondrial ETC  
265 complex density or mitochondrial dynamics genes. These findings suggest that the observed  
266 mitochondrial dysfunction was not due to changes in mitochondrial numbers or dynamics. In keeping

267 with the notion that ROS plays some role in mediating the downstream effects of ER stress activation,  
268 we observed a decline in the total thiol (sulphydryl) pool and elevations in H<sub>2</sub>O<sub>2</sub> levels, in  
269 combination with induced elevations of gene expression levels of *SOD2* and *PRDX3*. ROS generation  
270 in response to ER stress is well characterised, and its role in impairing mitochondrial function in  
271 muscle may in part be associated with the activation of uncoupling proteins. In *in vitro* model  
272 presented here, we observed elevated *UCP-3* gene expression in response to ER stress. Uncoupling  
273 proteins are redox sensitive, thus permitting proton leak across the inner mitochondrial membrane in  
274 response to ROS generation, a process uncoupling the link between oxidative phosphorylation and  
275 ATP synthesis, [33]. We therefore suggest that ER stress induces P-JNK/ROS-mediated uncoupling  
276 of the ETC, causing decreased oxygen utilisation and ATP synthesis, effects clearly ameliorated by  
277 17AAG. Our narrative of ROS involvement in these processes is supported by recent findings in a  
278 murine model of myositis, whereby weakness is associated with interferon- $\gamma$ -induced ROS generation,  
279 [34].

## 280 **Conclusions**

281 ER stress is thought to play an important role in inducing non-immune cell-mediated muscle  
282 contractile and energy deficits, and which are likely to apply in human myositis, [8, 9]. However, the  
283 precise mechanisms mediating weakness-induction downstream of ER stress remain unexplained. In  
284 the current experiments, we have modelled ER stress *in vitro*, and demonstrated obvious declines in  
285 mitochondrial function, but which are mitigated by 17AAG. These observations suggest that chronic  
286 ER stress in myositis may induce perturbations in mitochondrial function capable of causing  
287 bioenergetic deficits, which likely contribute to muscle weakness-induction.

288 While recognising the limitations of the use of an *in vitro* model, the link between ER and  
289 mitochondria is conserved across multiple species and cell types, so likely also applies in human  
290 skeletal muscle cells. Given the crucial role that muscle ER plays in controlling the calcium fluxes  
291 required to control complex muscle contractions, as well as controlling energy utilisation, it appears

292 likely that the mechanistic insights gained here do have some relevance for understanding human  
293 myositis, and other ER stress-associated myopathologies.

294

295

296

## 297 **Figure legends**

298 **Figure 1:** Schematic illustrating mitochondrial respiration states [O<sub>2</sub>], 15mM ADP was added to  
299 induce active respiration (state 3), and tracked over time through the depletion of ADP, driving the  
300 cells into state 4 respiration and finally oxygen depletion in the system. Values derived from the  
301 oxygraph experiment were used for the calculation of RCR and P:O.

302 **Figure 2:** Representative western blot images and quantified densitometry showing levels from  
303 myotubes treated with Tunicamycin, without and with 17AAG. Results of: **(A)** Caspase-12 (full and  
304 cleaved forms) – The increases in the cleaved forms at the 1.0 and 10 µg/ml doses confirmed that  
305 apoptosis had been induced at these dosages, while the unchanged cleaved form levels at the 0.1µg/ml  
306 dose confirmed this as a non-apoptotic dosage; **(B)** Grp94 – The increases with Tunicamycin  
307 confirmed that ER stress had been induced **(C)** Grp78 – The increases with Tunicamycin confirmed  
308 that ER stress had been induced, but unaffected by 17AAG; **(D)**; qPCR (un-spliced and spliced *XBP-1*  
309 gene expression) – The increases with Tunicamycin confirmed that ER stress had been induced. Data  
310 presented are mean ± SEM (n=3-6) \*p≤0.05.

311 **Figure 3:** **(A)** Representative light microscopy images (x10 magnification, 10µm scale bar) **(i)**  
312 control, **(ii)** Tunicamycin **(iii)** 17AAG + Tunicamycin, and quantified myotubular diameters –  
313 Tunicamycin induced significant fibre shrinkage, i.e. atrophy, an effect minimised by simultaneous  
314 17AAG treatment; **(B)** Quantified densitometry and representative western blot images of IκBα –

315 Tunicamycin induced obvious reductions in I $\kappa$ B $\alpha$  protein content, an effect prevented by 17AAG  
316 treatment; (C) qPCR data showing gene expression levels of *Atrogin-1* and *MuRF-1*, which showed  
317 no significant changes in response to Tunicamycin. Data presented are mean  $\pm$  SEM (n=3-6) \*p $\leq$ 0.05  
318 #p $\leq$ 0.01.

319 **Figure 4:** (A) Tunicamycin partially reduced the respiratory control ratio (RCR) and (B) significantly  
320 reduced the phosphate:oxygen (P:O) ratio and (C) the total ATP levels, these affects ameliorated by  
321 17AAG. (D) Mitochondrial complex density and representative western blot images showed no  
322 significant Tunicamycin-induced changes and (E) Shows expression levels of genes associated with  
323 the mitochondrial dynamics of biogenesis, fusion and fission: i.e. *MFN1*, *MFN2*, *COX I*, *COXIV*,  
324 citrate synthase, *MCIPI1*, *TFAM*, *PGC1-alpha*, *NRP1*, *OPA1*, *FIS1* and *DRP1* (See list of  
325 abbreviations), [23]. Genes associated with dynamics were all unaltered by Tunicamycin; (F) levels of  
326 phosphorylated JNK detected by ELISA; (G) representative western blot of phosphorylated JNK –  
327 Tunicamycin induced elevation in P-JNK, an effect prevented by 17AAG treatment. Data presented  
328 are mean  $\pm$  SEM (n=3-6) \*p $\leq$ 0.05.

329 **Figure 5:** (A) Gene expression levels of *UCP-3* were significantly increased by Tunicamycin, an  
330 effected blocked by 17AAG treatment, as were (B) Total thiol levels, (C) H<sub>2</sub>O<sub>2</sub> levels. Gene  
331 expression levels of (D) *SOD1* and *SOD2* and (E) of *PRDX I-VI* were increased by Tunicamycin  
332 treatment, an effect blocked by 17AAG treatment. Data presented are mean  $\pm$  SEM (n=4-6) \*p $\leq$ 0.05.

333 **Supplementary Table 1:** Primer sequences for the genes of interest in the qPCR analyses.

334 **Declarations of interest:** The authors have no competing interests to declare.

335 **Funding:** The authors would like to thank University of Liverpool and Myositis UK for their  
336 generous financial support.

## 337 **References**

338 1. Mastaglia FL, Phillips BA. Idiopathic inflammatory myopathies: epidemiology, classification,  
339 and diagnostic criteria. *Rheumatic diseases clinics of North America*. 2002 Nov; 28(4):723-741.

- 340 2. Salomonsson S, Lundberg IE. Cytokines in idiopathic inflammatory myopathies.  
341 Autoimmunity. 2006 May; 39(3):177-190.
- 342 3. Rayavarapu S, Coley W, Nagaraju K. An update on pathogenic mechanisms of inflammatory  
343 myopathies. *Curr Opin Rheumatol*. 2011 Nov; 23(6):579-584.
- 344 4. Coley W, Rayavarapu S, Pandey GS, Sabina RL, Van der Meulen JH, Ampong B, et al. The  
345 molecular basis of skeletal muscle weakness in a mouse model of inflammatory myopathy. *Arthritis*  
346 *Rheum*. 2012 Nov; 64(11):3750-3759.
- 347 5. Englund P, Lindroos E, Nennesmo I, Klareskog L, Lundberg IE. Skeletal muscle fibers express  
348 major histocompatibility complex class II antigens independently of inflammatory infiltrates in  
349 inflammatory myopathies. *Am J Pathol*. 2001 Oct; 159(4):1263-1273.
- 350 6. Basharat P, Christopher-Stine L. Immune-Mediated Necrotizing Myopathy: Update on  
351 Diagnosis and Management. *Curr Rheumatol Rep*. 2015 Dec; 17(12):72.
- 352 7. Lightfoot AP, McArdle A, Jackson MJ, Cooper RG. In the idiopathic inflammatory myopathies  
353 (IIM), do reactive oxygen species (ROS) contribute to muscle weakness? *Ann Rheum Dis*. 2015 Jul;  
354 74(7):1340-1346.
- 355 8. Lightfoot AP, Nagaraju K, McArdle A, Cooper R.G. Understanding the origin of non immune-  
356 cell mediated weakness in the idiopathic inflammatory myopathies (IIM) - Potential role of ER stress-  
357 pathways. *Curr Opin Rheumatol*. 2015; 27(6):580-585.
- 358 9. Nagaraju K, Casciola-Rosen L, Lundberg I, Rawat R, Cutting S, Thapliyal R, et al. Activation of  
359 the endoplasmic reticulum stress response in autoimmune myositis: potential role in muscle fiber  
360 damage and dysfunction. *Arthritis Rheum*. 2005 Jun; 52(6):1824-1835.
- 361 10. Bravo R, Vicencio JM, Parra V, Troncoso R, Munoz JP, Bui M, et al. Increased ER-  
362 mitochondrial coupling promotes mitochondrial respiration and bioenergetics during early phases of  
363 ER stress. *J Cell Sci*. 2011 Jul 1; 124(Pt 13):2143-2152.
- 364 11. Kaufman RJ, Malhotra JD. Calcium trafficking integrates endoplasmic reticulum function with  
365 mitochondrial bioenergetics. *Biochim Biophys Acta*. 2014 Oct; 1843(10):2233-2239.
- 366 12. Win S, Than TA, Fernandez-Checa JC, Kaplowitz N. JNK interaction with Sab mediates ER  
367 stress induced inhibition of mitochondrial respiration and cell death. *Cell death & disease*. 2014;  
368 5:e989.
- 369 13. Temiz P, Wehl CC, Pestronk A. Inflammatory myopathies with mitochondrial pathology and  
370 protein aggregates. *J Neurol Sci*. 2009 Mar 15; 278(1-2):25-29.
- 371 14. Varadhachary AS, Wehl CC, Pestronk A. Mitochondrial pathology in immune and  
372 inflammatory myopathies. *Curr Opin Rheumatol*. 2010 Nov; 22(6):651-657.
- 373 15. Lee CE, McArdle A, Griffiths RD. The role of hormones, cytokines and heat shock proteins  
374 during age-related muscle loss. *Clin Nutr*. 2007 Oct; 26(5):524-534.
- 375 16. Lightfoot A, McArdle A, Griffiths RD. Muscle in defense. *Crit Care Med*. 2009 Oct; 37(10  
376 Suppl):S384-390.
- 377 17. Kayani AC, Close GL, Broome CS, Jackson MJ, McArdle A. Enhanced recovery from  
378 contraction-induced damage in skeletal muscles of old mice following treatment with the heat shock  
379 protein inducer 17-(allylamino)-17-demethoxygeldanamycin. *Rejuvenation Res*. 2008 Dec;  
380 11(6):1021-1030.
- 381 18. Bradford MM. A rapid and sensitive method for the quantitation of microgram quantities of  
382 protein utilizing the principle of protein-dye binding. *Anal Biochem*. 1976 May; 72:248-254.
- 383 19. Livak KJ, Schmittgen TD. Analysis of relative gene expression data using real-time  
384 quantitative PCR and the 2<sup>-Delta Delta C(T)</sup> Method. *Methods*. 2001 Dec; 25(4):402-408.
- 385 20. Anderson EJ, Neuffer PD. Type II skeletal myofibers possess unique properties that potentiate  
386 mitochondrial H<sub>2</sub>O<sub>2</sub> generation. *Am J Physiol Cell Physiol*. 2006 Mar; 290(3):C844-851.
- 387 21. Perry CG, Kane DA, Lanza IR, Neuffer PD. Methods for assessing mitochondrial function in  
388 diabetes. *Diabetes*. 2013 Apr; 62(4):1041-1053.

- 389 22. Di Monte D, Bellomo G, Thor H, Nicotera P, Orrenius S. Menadione-induced cytotoxicity is  
390 associated with protein thiol oxidation and alteration in intracellular Ca<sup>2+</sup> homeostasis. Arch  
391 Biochem Biophys. 1984 Dec; 235(2):343-350.
- 392 23. Sakellariou GK, Pearson T, Lightfoot AP, Nye GA, Wells N, Giakoumaki II, et al. Long-term  
393 administration of the mitochondria-targeted antioxidant mitoquinone mesylate fails to attenuate  
394 age-related oxidative damage or rescue the loss of muscle mass and function associated with aging  
395 of skeletal muscle. FASEB J. 2016 Nov; 30(11):3771-3785.
- 396 24. Hotamisligil GS. Endoplasmic reticulum stress and the inflammatory basis of metabolic  
397 disease. Cell. 2010 Mar; 140(6):900-917.
- 398 25. Bodine SC, Baehr LM. Skeletal muscle atrophy and the E3 ubiquitin ligases MuRF1 and  
399 MAFbx/atrogin-1. Am J Physiol Endocrinol Metab. 2014 Sep 15; 307(6):E469-484.
- 400 26. Vitadello M, Doria A, Tarricone E, Ghirardello A, Gorza L. Myofiber stress-response in  
401 myositis: parallel investigations on patients and experimental animal models of muscle regeneration  
402 and systemic inflammation. Arthritis Res Ther. 2010; 12(2):R52.
- 403 27. Lightfoot AP, Sakellariou GK, Nye GA, McArdle F, Jackson MJ, Griffiths RD, et al. SS-31  
404 attenuates TNF- $\alpha$  induced cytokine release from C2C12 myotubes. Redox Biol. 2015 Dec; 6:253-259.
- 405 28. Senf SM, Dodd SL, McClung JM, Judge AR. Hsp70 overexpression inhibits NF-kappaB and  
406 Foxo3a transcriptional activities and prevents skeletal muscle atrophy. FASEB J. 2008 Nov;  
407 22(11):3836-3845.
- 408 29. Urano F, Wang X, Bertolotti A, Zhang Y, Chung P, Harding HP, et al. Coupling of stress in the  
409 ER to activation of JNK protein kinases by transmembrane protein kinase IRE1. Science. 2000 Jan 28;  
410 287(5453):664-666.
- 411 30. Li J, Soroka J, Buchner J. The Hsp90 chaperone machinery: conformational dynamics and  
412 regulation by co-chaperones. Biochim Biophys Acta. 2012 Mar; 1823(3):624-635.
- 413 31. Mosser DD, Caron AW, Bourget L, Meriin AB, Sherman MY, Morimoto RI, et al. The  
414 chaperone function of hsp70 is required for protection against stress-induced apoptosis. Mol Cell  
415 Biol. 2000 Oct; 20(19):7146-7159.
- 416 32. Lee JS, Lee JJ, Seo JS. HSP70 deficiency results in activation of c-Jun N-terminal Kinase,  
417 extracellular signal-regulated kinase, and caspase-3 in hyperosmolarity-induced apoptosis. J Biol  
418 Chem. 2005 Feb 25; 280(8):6634-6641.
- 419 33. Echtay KS, Roussel D, St-Pierre J, Jekabsons MB, Cadenas S, Stuart JA, et al. Superoxide  
420 activates mitochondrial uncoupling proteins. Nature. 2002 Jan; 415(6867):96-99.
- 421 34. Meyer A, Laverny G, Allenbach Y, Grelet E, Ueberschlag V, Echaniz-Laguna A, et al. IFN-beta-  
422 induced reactive oxygen species and mitochondrial damage contribute to muscle impairment and  
423 inflammation maintenance in dermatomyositis. Acta Neuropathol. 2017 Oct; 134(4):655-666.

#### 424 **List of abbreviations**

425 **17AAG** - 17-N-allylamino-17-demethoxygeldanamycin; **MCIP1** - Modulatory calcineurin interacting  
426 protein 1; **TFAM** - Mitochondrial transcription factor A; **DRP1** - Dynamin-related protein 1; **PGC1 $\alpha$**   
427 - Peroxisome proliferator-activated receptor gamma coactivator 1-alpha; **MFN1** - Mitofusin 1; **MFN2**  
428 - Mitofusin 2; **COX I** - Cytochrome *c* oxidase subunit I; **COX IV** - Cytochrome *c* oxidase subunit  
429 IV; **NRF1** - Nuclear respiratory factor 1; **OPA1** - Optic atrophy type 1; **FIS1** - Mitochondrial fission  
430 1 protein; **Grp78** - Glucose regulate protein 78; **Grp94** - Glucose regulate protein 94; **PRDX** -  
431 Peroxiredoxin ; **UCP-3** - Uncoupling protein 3; **SOD1** - Superoxide dismutase 1; **SOD2** -  
432 Superoxide dismutase 2; **I $\kappa$ B $\alpha$**  - I kappa B alpha; **JNK** - c-Jun N-terminal kinase; **RCR** - Respiratory  
433 control ratio; **P:O** - Phosphate : Oxygen; **XBP-1** - X-box binding protein 1.



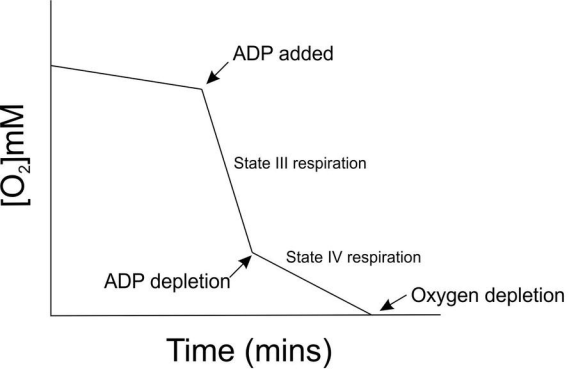

Figure 1

■ Total Casp 12 ■ Cleaved Casp 12

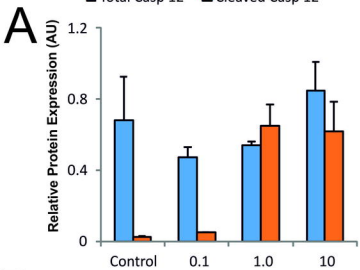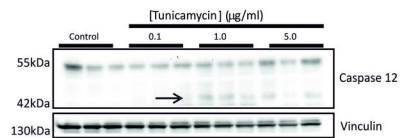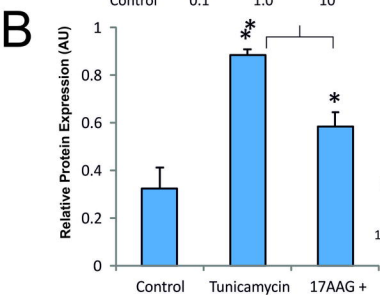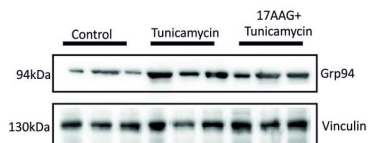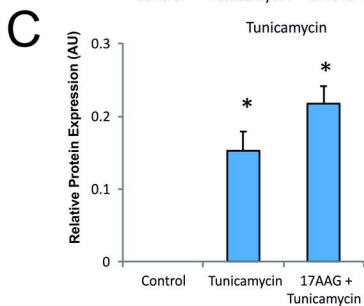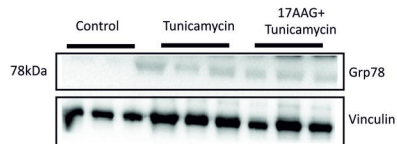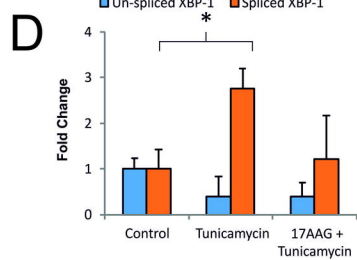

**A**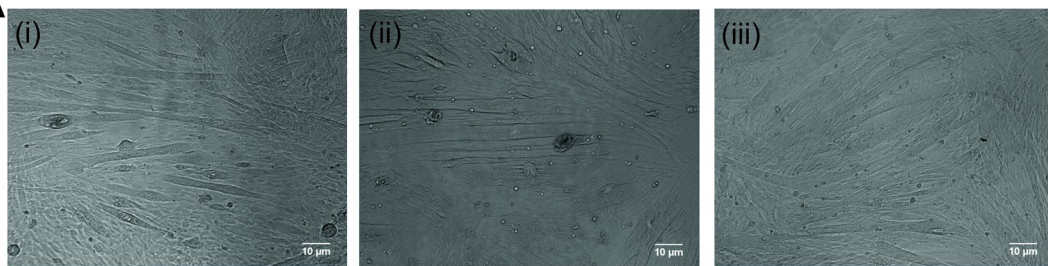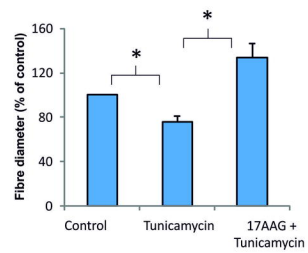**B**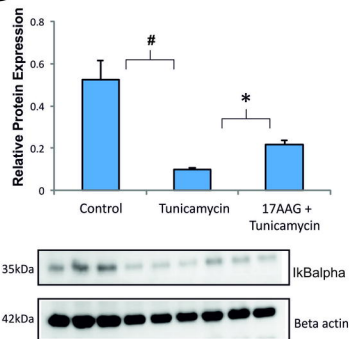**C**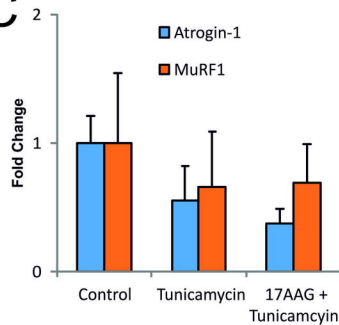

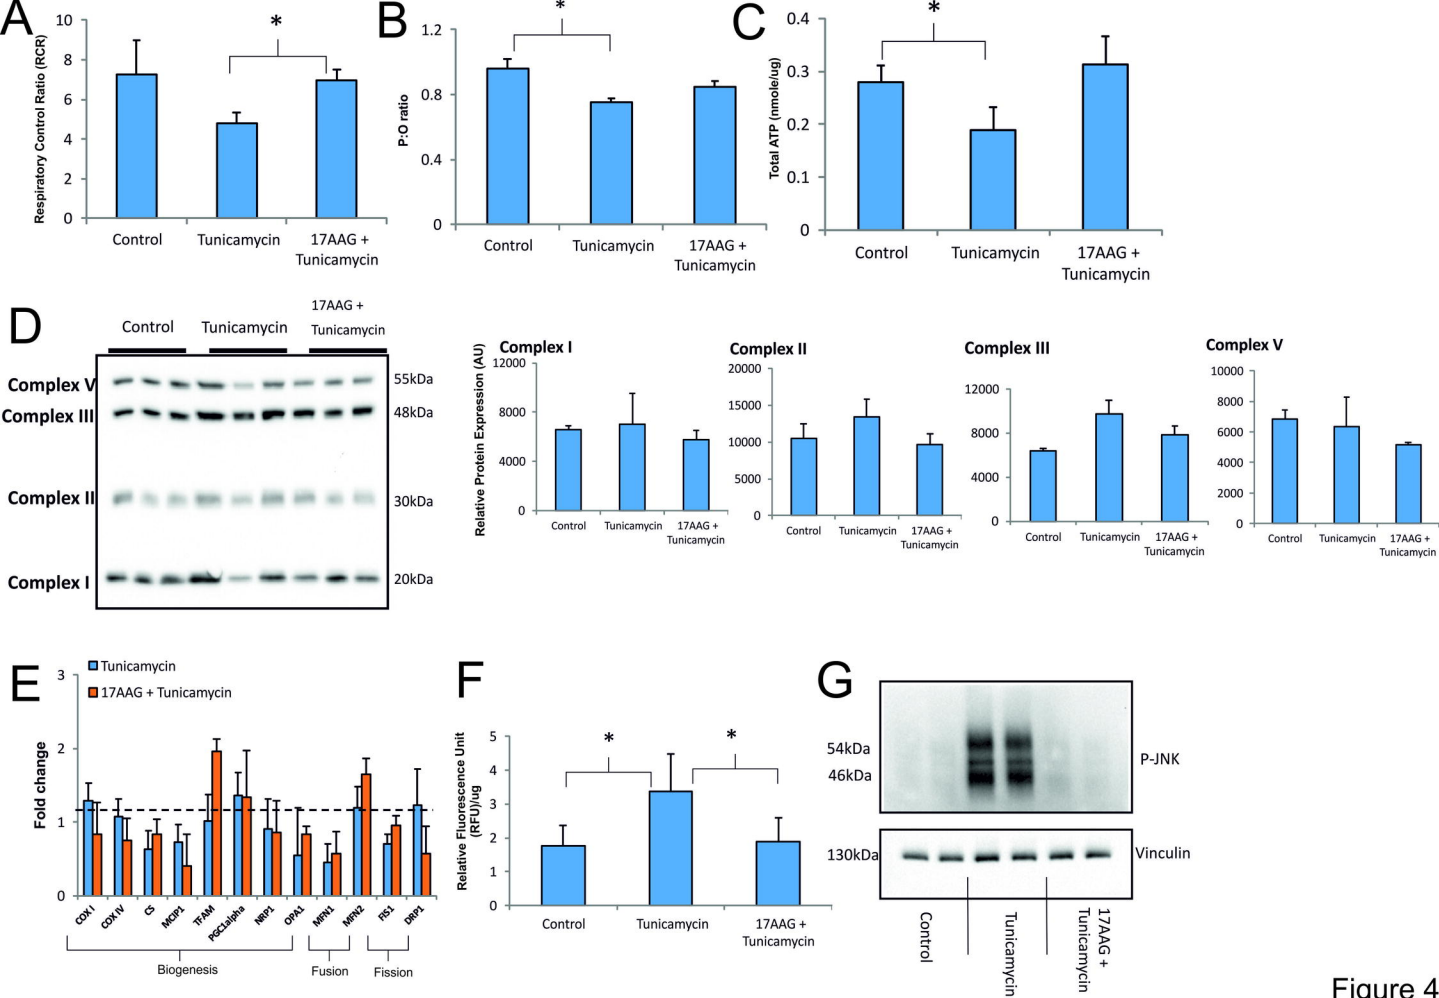

Figure 4

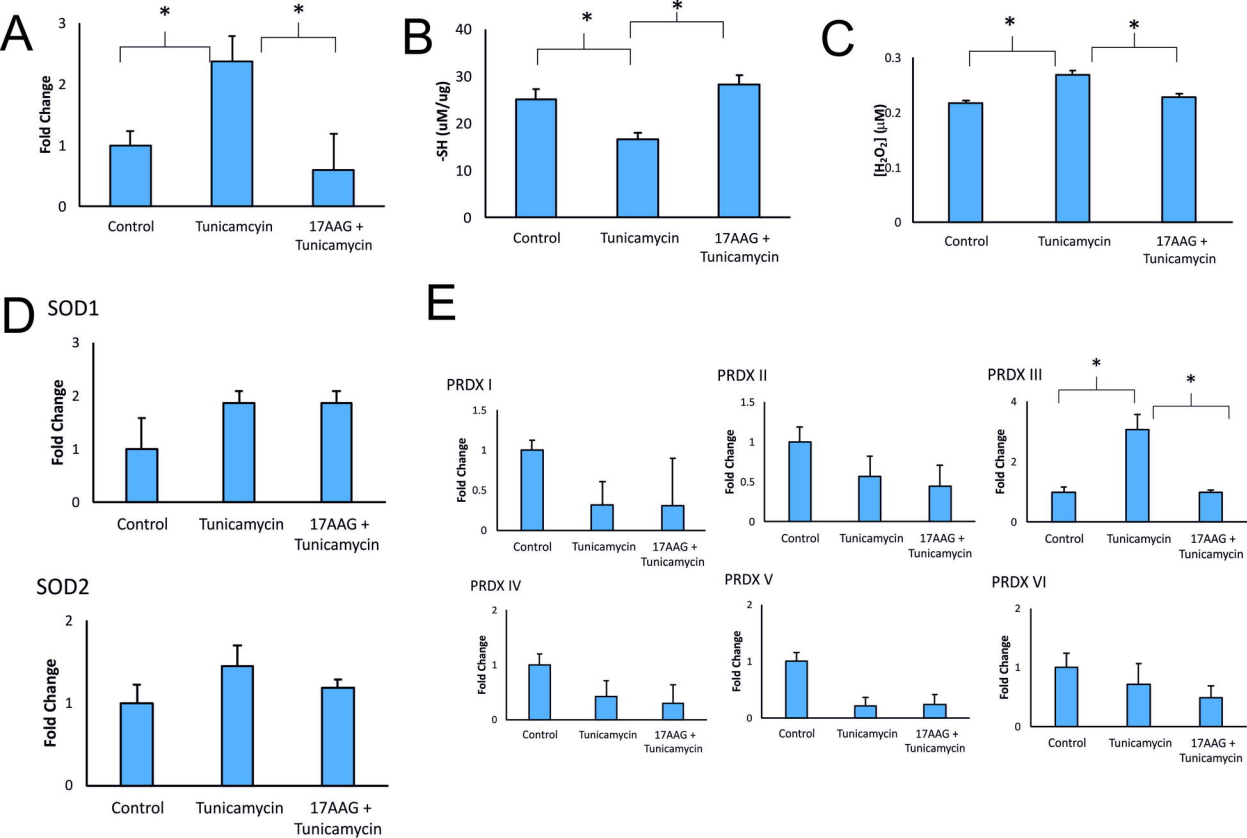

Figure 5
